# Supplementary material
Source: HighWire-hosted journal article supplement (https://cmaj.ca/highwire/filestream/81736/field_highwire_adjunct_files/1/202392-res-2-at.pdf)
Supplement: 202392-res-2-at.pdf [file 202392-res-2-at.pdf]

## Supplementary Appendix 2: Confounder Analysis

We conducted a confounder analysis to estimate how large an imbalance of cocaine use (as an unmeasured confounder) would have to be between the cannabis-user and non-user groups to nullify the association with history of myocardial infarction. To do this, we performed a sensitivity analysis based on an array of informed assumptions as outlined by Schneeweiss. (PMID: 16447304) Assumptions for the sensitivity analysis are included in the table below.

| Variable                                                                            | Assumed Value            | Justification                                                                                                                                                                                                                                                                                                                                                                                                                                                                                          |
|-------------------------------------------------------------------------------------|--------------------------|--------------------------------------------------------------------------------------------------------------------------------------------------------------------------------------------------------------------------------------------------------------------------------------------------------------------------------------------------------------------------------------------------------------------------------------------------------------------------------------------------------|
| Apparent exposure relative risk                                                     | 2.07                     | This is the odds ratio from our primary analysis, since the odds ratio provides a reasonable approximation of the relative risk when the outcome is rare.                                                                                                                                                                                                                                                                                                                                              |
| Prevalence of the confounder in the unexposed                                       | 0.05 (5%)                | Recent estimates from the National Survey on Drug Use and Health suggest the prevalence of past-year cocaine use among young adults is: (PMID: 32702620)<br>5.72% (among those aged 18-25 years),<br>4.47% (among those aged 26-34 years), and<br>1.65% (among those aged from 35-49 years).                                                                                                                                                                                                           |
| Apparent confounder relative risk #1: among cocaine ever-users                      | 2 (rounded up from 1.77) | The multivariate adjusted odds ratio for history of myocardial infarction between cocaine ever-users vs. never users among young adults (aged 18-45 years) obtained from respondents of the National Health and Nutrition Examination Survey (PMID: 18929694)<br><br>This effect estimate was rounded up to the nearest whole number to provide a conservative estimate.                                                                                                                               |
| Apparent confounder relative risk #2: among those with >10 instances of cocaine use | 4 (rounded up from 3.84) | The multivariate adjusted odds ratio for history of myocardial infarction between those with >10 instances of lifetime cocaine use vs. never users among young adults (aged 18-45 years) obtained from respondents of the National Health and Nutrition Examination Survey (PMID: 18929694)<br><br>This effect estimate was rounded up to the nearest whole number to provide a conservative estimate.                                                                                                 |
| Threshold for plausible prevalence of confounder in the exposed                     | 0.126 (12.6%)            | In a cohort of young adults (aged 18-25 years), the estimated probability of recent cocaine use among cannabis-users ranged from <5% among monthly cannabis-users to 12.6% among daily cannabis users. The estimated probability of cannabis use increased with greater frequency of cannabis use. (PMID: 25115183)<br><br>To provide a conservative estimate, we used the highest estimated probability of recent cocaine use among cannabis-users (0.126) as our threshold for plausible prevalence. |

### Confounder Analysis #1: Assuming that Cocaine Users in our Cohort are Ever-Users (Used Cocaine $\geq 1$ Instance During Lifetime)

This confounder analysis assumes a relative risk of 2 for the association between cocaine use and history of myocardial infarction.

| Association between exposure and disease outcome                                                                                  | Association between confounder and disease outcome | Prevalence of confounder in the unexposed | Prevalence of confounder in the exposed | "True" or fully adjusted exposure relative risk |
|-----------------------------------------------------------------------------------------------------------------------------------|----------------------------------------------------|-------------------------------------------|-----------------------------------------|-------------------------------------------------|
| 2.07                                                                                                                              | 2                                                  | 0.05                                      | 0                                       | 2.17                                            |
| 2.07                                                                                                                              | 2                                                  | 0.05                                      | 0.1                                     | 1.98                                            |
| <i>Prevalence of confounder in the exposed values exceeding 0.126 (12.6%) are above our pre-defined threshold of plausibility</i> |                                                    |                                           |                                         |                                                 |
| 2.07                                                                                                                              | 2                                                  | 0.05                                      | 0.2                                     | 1.81                                            |
| 2.07                                                                                                                              | 2                                                  | 0.05                                      | 0.3                                     | 1.67                                            |
| 2.07                                                                                                                              | 2                                                  | 0.05                                      | 0.4                                     | 1.55                                            |
| 2.07                                                                                                                              | 2                                                  | 0.05                                      | 0.5                                     | 1.45                                            |
| 2.07                                                                                                                              | 2                                                  | 0.05                                      | 0.6                                     | 1.36                                            |
| 2.07                                                                                                                              | 2                                                  | 0.05                                      | 0.7                                     | 1.28                                            |
| 2.07                                                                                                                              | 2                                                  | 0.05                                      | 0.8                                     | 1.21                                            |
| 2.07                                                                                                                              | 2                                                  | 0.05                                      | 0.9                                     | 1.14                                            |
| 2.07                                                                                                                              | 2                                                  | 0.05                                      | 1                                       | 1.09                                            |

Therefore, assuming a definition of cocaine use as  $\geq 1$  instance during lifetime, we observe that the “true” or fully adjusted exposure relative risk of history of myocardial infarction in cannabis-users not nullified, even if the prevalence of cocaine use among cannabis-users is 100%, which exceeds our pre-defined threshold for plausible prevalence of confounder in the exposed of 12.6%.

Confounder Analysis #2: Assuming Cocaine Users in our Cohort have >10 Instances of Lifetime Cocaine Use (High Lifetime Frequency of Cocaine Use).

This confounder analysis assumes a relative risk of 4 for the association between cocaine use and history of myocardial infarction.

| Association between exposure and disease outcome                                                                                  | Association between confounder and disease outcome | Prevalence of confounder in the unexposed | Prevalence of confounder in the exposed | "True" or fully adjusted exposure relative risk |
|-----------------------------------------------------------------------------------------------------------------------------------|----------------------------------------------------|-------------------------------------------|-----------------------------------------|-------------------------------------------------|
| 2.07                                                                                                                              | 4                                                  | 0.05                                      | 0                                       | 2.38                                            |
| 2.07                                                                                                                              | 4                                                  | 0.05                                      | 0.1                                     | 1.83                                            |
| <i>Prevalence of confounder in the exposed values exceeding 0.126 (12.6%) are above our pre-defined threshold of plausibility</i> |                                                    |                                           |                                         |                                                 |
| 2.07                                                                                                                              | 4                                                  | 0.05                                      | 0.2                                     | 1.49                                            |
| 2.07                                                                                                                              | 4                                                  | 0.05                                      | 0.3                                     | 1.25                                            |
| 2.07                                                                                                                              | 4                                                  | 0.05                                      | 0.4                                     | 1.08                                            |
| 2.07                                                                                                                              | 4                                                  | 0.05                                      | <b>0.5</b>                              | <b>0.95</b>                                     |
| 2.07                                                                                                                              | 4                                                  | 0.05                                      | <b>0.6</b>                              | <b>0.85</b>                                     |
| 2.07                                                                                                                              | 4                                                  | 0.05                                      | <b>0.7</b>                              | <b>0.77</b>                                     |
| 2.07                                                                                                                              | 4                                                  | 0.05                                      | <b>0.8</b>                              | <b>0.70</b>                                     |
| 2.07                                                                                                                              | 4                                                  | 0.05                                      | <b>0.9</b>                              | <b>0.64</b>                                     |
| 2.07                                                                                                                              | 4                                                  | 0.05                                      | <b>1</b>                                | <b>0.60</b>                                     |

Therefore, assuming a definition of cocaine use as >10 instances during lifetime (high lifetime frequency), we observe that the “true” or fully adjusted exposure relative risk is nullified when the prevalence of cocaine use among cannabis-users is >40% (>0.4; highlighted in table), which exceeds our pre-defined threshold for plausible prevalence of confounder in the exposed of 12.6% by a magnitude of >3 fold.
